# Supplementary material for: A Non-Coding Genomic Duplication at the HMX1 Locus Is Associated with Crop Ears in Highland Cattle
Source: PubMed Central journal article supplement (PMC3806818; doi:10.1371/journal.pone.0077841), 2013-10-23
Supplement: pone.0077841.s002.pdf [file pone.0077841.s002.pdf]

**Table S1:** Primer sequences for the amplification of bovine *HMX1* sequence variants. Positions refer to BTA 6 of the UMD 3 genome assembly.

| <i>HMX1</i>               | Forward primer |                      | Reverse primer |                       | PCR product size (bp) |
|---------------------------|----------------|----------------------|----------------|-----------------------|-----------------------|
|                           | Start          | Sequence 5'-3'       | Start          | Sequence 3'-5'        |                       |
| Exon 1                    | 106871605      | CCATAGAGCCCACCACAGAC | 106872770      | TCCTTGCTGGACAGTGATTG  | 1166                  |
| Exon 2                    | 106868022      | TTACATTCTGGCCGATCCTC | 106869009      | GGGACTGTTTCCTTGCTGTG  | 988                   |
| Highly conserved region   | 106719573      | TGCCCTGAGAACTTTCCATC | 106720504      | CAGCGACCCTCTCTCTTTG   | 932/1008*             |
| Primer for diagnostic PCR | 106720053      | CCGAGCTGCCTCTCTGGA   | 106720388      | GAATCAGACAAGATCGCATCC | 336/412*              |

\*PCR product size in wild type animals/in mutants.
