# Supplementary material for: A Non-Coding Genomic Duplication at the HMX1 Locus Is Associated with Crop Ears in Highland Cattle
Source: PubMed Central journal article supplement (PMC3806818; doi:10.1371/journal.pone.0077841), 2013-10-23
Supplement: pone.0077841.s003.pdf [file pone.0077841.s003.pdf]

**Table S2:** Number of genotyped animals in 23 different breeds

| <b>Breed</b>     | <b>Number of animals</b> |
|------------------|--------------------------|
| Angus            | 10                       |
| Aubrac           | 1                        |
| Ayrshire         | 1                        |
| Belgian Blue     | 2                        |
| Belted Galloway  | 8                        |
| Braunvieh        | 11                       |
| Chianina         | 8                        |
| Dutch Belted     | 9                        |
| Eringer          | 17                       |
| Gelbvieh         | 1                        |
| Hereford         | 2                        |
| Holstein         | 24                       |
| Jersey           | 3                        |
| Limousin         | 1                        |
| Montbéliard      | 3                        |
| Nelore           | 2                        |
| Olore            | 2                        |
| Pinzgauer        | 8                        |
| Romagnola        | 2                        |
| Rotes Höhenvieh  | 13                       |
| Salers           | 1                        |
| Simmental        | 6                        |
| Tiroler Grauvieh | 9                        |
| <b>Total</b>     | <b>144</b>               |
