# Supplementary material for: A Non-Coding Genomic Duplication at the HMX1 Locus Is Associated with Crop Ears in Highland Cattle
Source: PLOS journal article supplement (doi:10.1371/journal.pone.0077841), 2013-10-23
Supplement: S1 (10.1371/journal.pone.0077841.s001) [file journal.pone.0077841.s001]

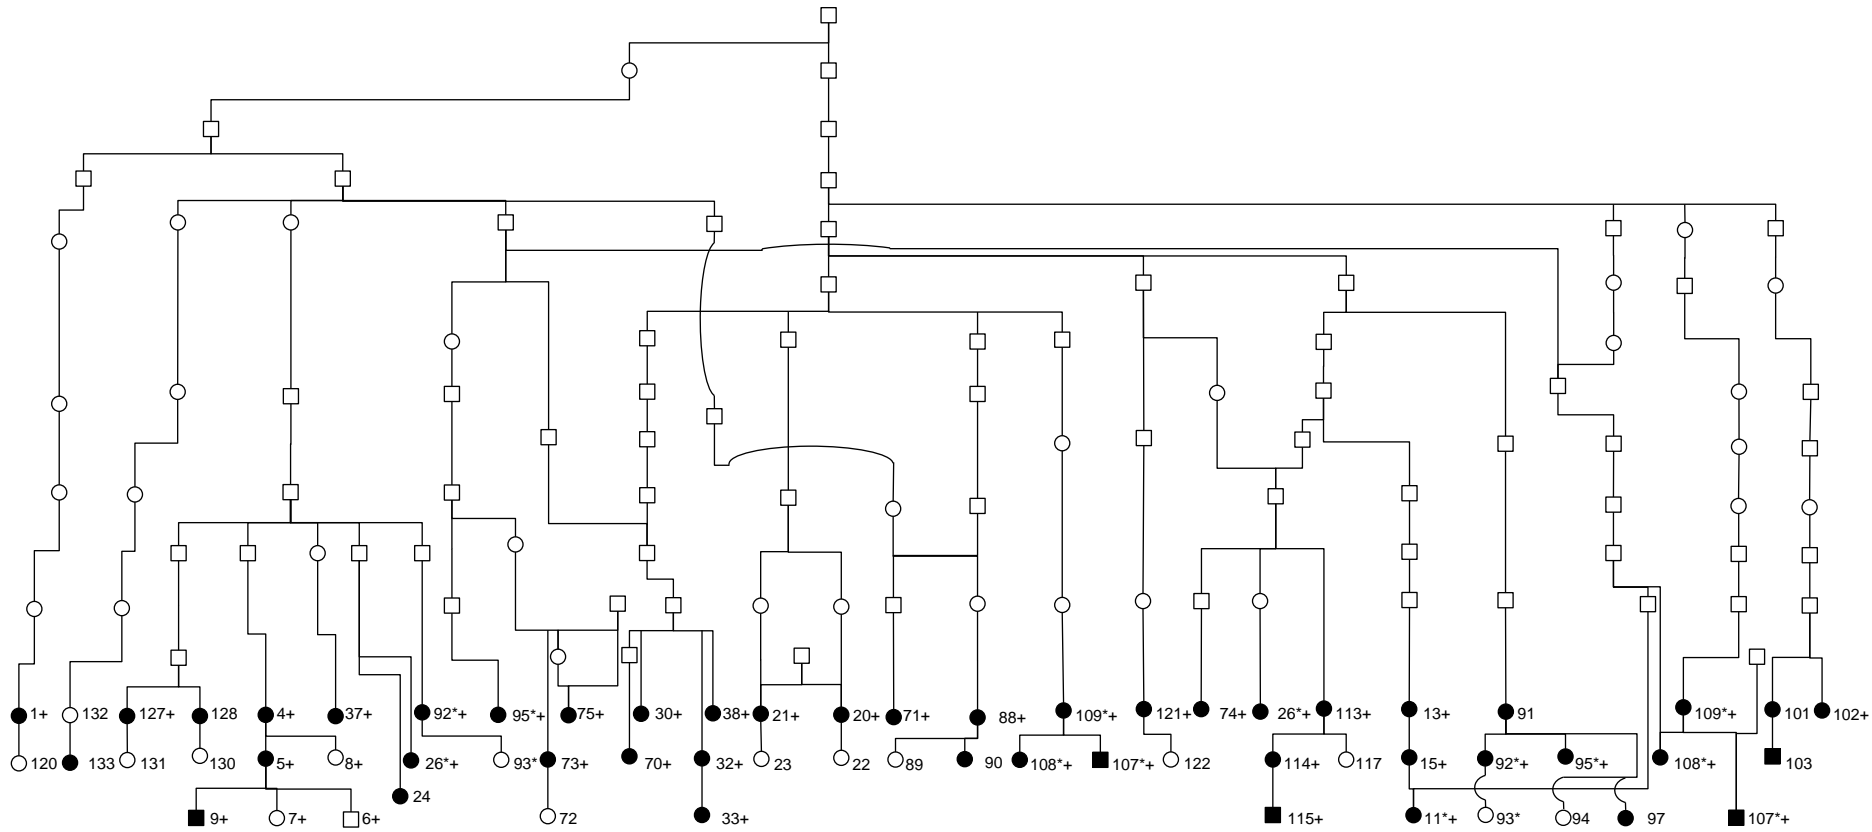

**Supplementary Figure 1: Pedigree of the collected Highland cattle with crop ears.** Note the multiple inbreeding loops and the earliest common ancestor appearing 8-12 generations ago. Only for the numbered animals the ear status was recorded. Affected animals are shown with black symbols, females are shown as circles and males as squares (\*these animals were selected for SNP genotyping; \*these animals appear twice).
